# Supplementary material
Source: PubMed Central journal article supplement (PMC6459397)
Supplement: NIHMS1005853-supplement-S1.pdf [file NIHMS1005853-supplement-S1.pdf]

## Supporting Information

### Kinetic Understanding of N<sub>2</sub> Reduction versus H<sub>2</sub> Evolution at the E<sub>4</sub>(4H) Janus State in the Three Nitrogenases

Derek F. Harris<sup>a</sup>, Zhi-Yong Yang<sup>a</sup>, Dennis R. Dean<sup>b</sup>, Lance C. Seefeldt<sup>a\*</sup>, Brian M. Hoffman<sup>c\*</sup>

<sup>a</sup>Department of Chemistry and Biochemistry, Utah State University, Logan, Utah 84322, USA.

<sup>b</sup>Department of Biochemistry, Virginia Tech, Blacksburg, Virginia 24061, USA.

<sup>c</sup>Department of Chemistry, Northwestern University, Evanston, Illinois 60208, USA.

#### Steady-State Kinetic Analysis of Scheme D

The equations that describe the time-dependence of the populations of the three states comprising the high-flux **Schemes C** are given in **eq S1**, where, setting the population derivatives to zero expresses the steady-state condition, namely populations are invariant in time.

$$\frac{dE_2(2H)}{dt} = -(k_{ac} + k_{HP})E_2(2H) + k_{HP}E_4(4H) + k_{cat}E_4(2N2H) \xrightarrow{SS} 0$$

$$\frac{dE_4(4H)}{dt} = -(k_{HP} + k_{re}P(N_2))E_4(4H) + k_{ac}E_2(2H) \xrightarrow{SS} 0$$

$$\frac{dE_4(2N2H)}{dt} = -k_{cat}E_4(2N2H) + k_{re}P(N_2)E_4(4H) \xrightarrow{SS} 0$$

**S1**

$$E_4(2H) + E_4(4H) + E_4(2N2H) = E_0^0$$

The three kinetic equations, in combination with the ‘conservation’ condition that the populations of the three states sum to the total enzyme population,  $E_0^0$ , can be solved to obtain formulas for the steady-state populations of the three states involved in the scheme.

$$\frac{E_2(2H)}{E_0^0} \xrightarrow{ss} \frac{\left(\frac{k_{HP}}{k_{ac}}\right) + \left(\frac{k_{re}}{k_{ac}}\right) P_{N_2}}{1 + \left(\frac{k_{HP}}{k_{ac}}\right) + \left(\frac{k_{re}}{k}\right) P_{N_2}}$$

$$\frac{E_4(4H)}{E_0^0} \xrightarrow{ss} \frac{1}{1 + \left(\frac{k_{HP}}{k_{ac}}\right) + \left(\frac{k_{re}}{k}\right) P_{N_2}}$$

$$\frac{E_4(2N_2H)}{E_0^0} \xrightarrow{ss} \frac{\left(\frac{k_{re}}{k_{cat}}\right) P_{N_2}}{1 + \left(\frac{k_{HP}}{k_{ac}}\right) + \left(\frac{k_{re}}{k}\right) P_{N_2}}$$

$$\frac{1}{k} = \frac{1}{k_{ac}} + \frac{1}{k_{cat}}$$

S2

The rates of formation of products are obtained by multiplying the populations involved with the appropriate rate constants,

$$\frac{dNH_3}{dt} = -2 \frac{dN_2}{dt} = k_{cat} E_4(2N_2H) \quad \frac{dH_2}{dt} = k_{HP} E_2(2H) + (k_{HP} + k_{re} P_{N_2}) E_4(4H)$$

$$\xrightarrow{ss} k_{NH_3} \cdot E_0^0$$

$$\xrightarrow{ss} k_{H_2} \cdot E_0^0$$

S3

The final steady-state rate constants,  $k_{NH_3}$ ,  $k_{H_2}$ , are given in the text. As the populations, and thus product formation, are zeroth order in time, the accumulation of product is simply proportional to the rate constant, the total enzyme concentration, and time.

As discussed in the text, **Scheme C**, and the rate constants presented in the main text, incorporate HP at both  $E_2(2H)$  and  $E_4(4H)$ . However, as the flux increases, whether or not  $N_2$  is present and/or  $P_{N_2}$  becomes large, the population of  $E_2(2H)$  becomes negligible,

$$\frac{E_2(2H)}{E_4(4H) + E_4(2N_2H)} = \frac{\left(\frac{k_{HP}}{k_{ac}}\right) + \left(\frac{k_{re}}{k_{ac}}\right) P_{N_2}}{1 + \left(\frac{k_{re}}{k_{cat}}\right) P_{N_2}} \begin{cases} \left(\frac{k_{HP}}{k_{ac}}\right) \xrightarrow{hi\ flux} 0; P_{N_2} \rightarrow 0 \\ \left(\frac{k_{cat}}{k_{ac}}\right) \xrightarrow{hi\ flux} 0; P_{N_2} \rightarrow \infty \end{cases}$$

S4

and as a result, HP at  $E_2(2H)$  is quenched and **Scheme C** evolves into **Scheme D**. In the absence of  $N_2$ , of course  $E_4(2N_2H)$  cannot form and its population vanishes. At high  $N_2$  pressures,  $E_4(4H)$  itself gets depopulated as the system is ‘pushed’ to  $E_4(2N_2H)$  by the second-order reaction with  $N_2/re$  of  $H_2$ ,

$$\frac{E_4(4H)}{E_4(2N2H)} = \frac{1}{k_{re} P_{N_2}} \xrightarrow{P_{N_2} \rightarrow \infty} 0$$

S5

As a final comment, the formulation presented here, with populations and rate constants for **Schemes C, D** is designed for the description of high-flux experiments and is only valid in that regime because it assumes  $E_0$  doesn't ever accumulate; such accumulation would occur at low flux, which thus would require populations to be calculated with **Scheme B**. However, the flux dependence of the ratio of rate constants,  $r = k_{H_2}/k_{N_2}$ , presented in **eq 6** is valid as the system falls out of the high-flux regime because it is the *ratio* of product-formation rate constants, and thus depends only on the relative populations of the reacting states, namely the two  $E_4$  and  $E_2$  in **Schemes B-D**.

### $H_2$ *oa* and the Steady-State Kinetics

As described in **Fig 1**, the *re/oa* process is a dynamic equilibrium, with the forward *re* process driven by  $N_2$  binding and the reverse reaction induced by  $H_2$  binding.<sup>1-6</sup> The kinetic analysis in the main text ignores the *oa* reaction, because the turnover is not carried out under an atmosphere containing  $H_2$ . But such situations can arise, as for example in our turnover experiments under an atmosphere of  $N_2$ ,  $C_2H_2$ , and added  $D_2$ , which showed that  $E_4(2H,2D)$  forms by *oa* (it reacts with  $C_2H_2$  to form *cis*- $C_2H_2D_2$ ). Moreover, *some*  $H_2$  is generated during the turnover experiments. Therefore, we here analyze the influence of  $H_2$  *oa* on the kinetics, and in so doing show that it is proper to ignore this in treating the reported experiments.

The presence of  $H_2/D_2$  and its *oa* reaction with  $E_4(2N2H)$  clearly would inhibit the net formation and reaction of  $E_4(2N2H)$ . This is straightforwardly incorporated as an extension of the reactions of  $E_4(2N2H)$  (**Fig 2**), as shown in **Fig S1**. The  $E_4(2N2H)$  intermediate is formed by

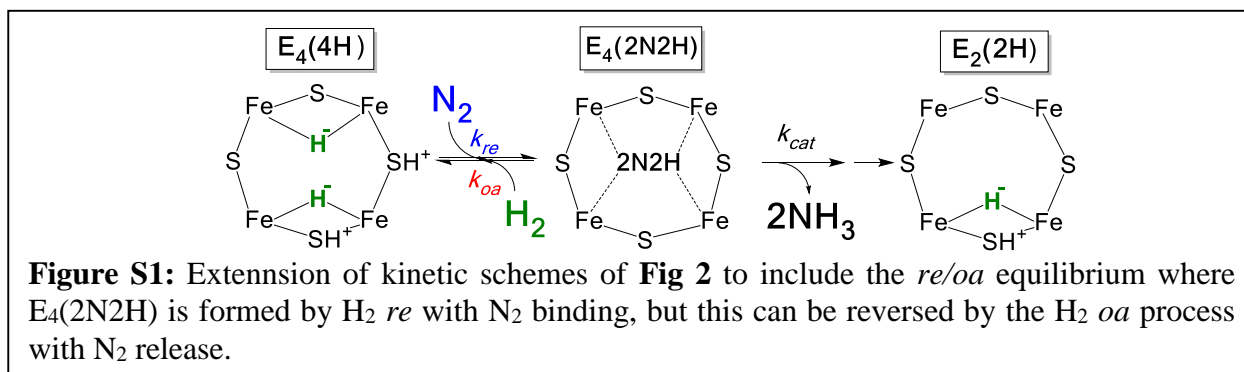

$N_2$  binding and lost through a competition between the second-order process of  $H_2$  *oa* and first-order progress to  $NH_3$  formation. This intermediate itself may then be taken to be in steady-state, leading to the further simplified **Scheme E** in which  $E_4(4H)$  reacts with  $N_2$  with the composite second-order steady-state rate constant,  $k_{reac}$ , and, upon directly returning to  $E_0$ , in turn is promptly reduced to  $E_2(2H)$ . The kinetic cycle thus involves only  $E_4(4H)$  and  $E_2(2H)$ , with  $k_{reac}$  given in **eq S1**,  $k_{HP}$  and  $k_{ac}$  defined as in the other Schemes. The *oa* reaction with  $H_2$  is incorporated into the

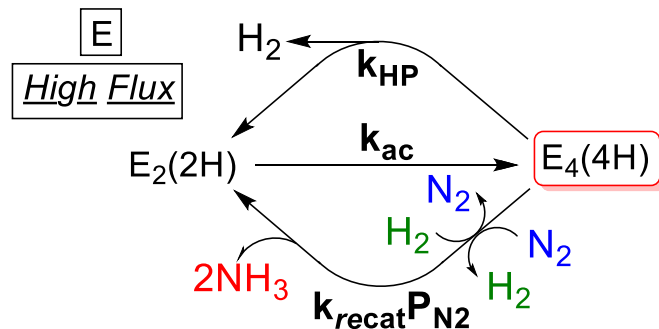

steady-state rate constant,  $k_{reocat}$ , which is a function of the  $H_2$  partial pressure.

$$k_{reocat} = \frac{k_{cat}k_{re}}{k_{cat} + k_{oa}P_{H_2}} = \frac{k_{re}}{1 + \frac{(k_{oa}P_{H_2})}{k_{cat}}} \quad \boxed{\text{S6}}$$

We recently measured<sup>1</sup> the equilibrium constant for the *re/oa* equilibrium for Mo-nitrogenase to be,  $K_{re/oa} \sim 2$ , implying that  $k_{oa} \sim k_{re}/2 = 42 \text{ atm}^{-1}\text{sec}^{-1}$  using the value for Mo-nitrogenase in **Table 1**. The experimental vessel used in turnover experiments has a headspace volume of  $\sim 8 \text{ mL}$ , and the maximum amount of  $H_2$  produced in a turnover experiment (at  $P_{N_2} = 0$ ),  $\sim 1700 \text{ nmoles}$ , corresponds to a partial pressure of  $P_{H_2} \sim 5 \times 10^{-3} \text{ atm}$ . As a first-approximation, we may take the average pressure during  $H_2$  accumulation in such an experiment to be half that,  $\sim 2.5 \times 10^{-3} \text{ atm}$  (a precise integration of the differential equations that arise from Scheme **E** is possible, but does not change the discussion here significantly). With these values, then during a turnover experiment, the *oa* of  $H_2$  yields a maximum contribution to the denominator of **eq S1** of,  $k_{oa}P_{H_2} < 0.1 \text{ sec}^{-1}$ . As the analysis in the main text shows that,  $k_{cat} \bar{k} \geq 11 \text{ sec}^{-1}$ , the analysis here shows that the ‘inhibition’ of the forward *re* reaction caused by *oa* of  $H_2$  formed during catalysis can cause *no more* than  $\sim 1\%$  variation in the value of  $k_{re}$  for Mo-nitrogenase determined by ignoring *oa*. *Moreover*, as extensively discussed in the main text,  $H_2$  formation is suppressed when reaction with  $N_2$  is significant (**Fig 5**), so even this value is an over-estimate of the impact of *oa* for Mo-nitrogenase.

The maximum amount of  $H_2$  produced during a Fe-nitrogenase titration is  $\sim 1/2$  that for Mo-nitrogenase, but  $k_{re}$ , and thus  $k_{oa}$  are  $\sim 10$ -fold greater, resulting in an (overestimate) upper bound of  $< 5\%$  decrease in the reported  $k_{re}$  for Fe-nitrogenase, well below the uncertainty in the measurement.

Thus, although the inclusion of  $H_2$  *oa* would be essential for analysis of turnover with significant *added* pressures of  $H_2/D_2$ , this analysis validates the simplification introduced in Schemes **B-D** of ignoring inhibition of  $N_2$  fixation by *oa* of  $H_2$  formed during steady-state turnover.

Data for Figures 4-6 and Table 1

| <b>Table S1:</b> Specific activities of P <sub>N<sub>2</sub></sub> titration, equation used in SigmaPlot, and derived constants from <b>Figure 4.</b> |                                                                       |                                              |                                                   |
|-------------------------------------------------------------------------------------------------------------------------------------------------------|-----------------------------------------------------------------------|----------------------------------------------|---------------------------------------------------|
| <b>Mo-nitrogenase</b>                                                                                                                                 |                                                                       |                                              |                                                   |
| <b>P<sub>N<sub>2</sub></sub><br/>(atm)</b>                                                                                                            | <b>Specific Activity -<br/>nmol NH<sub>3</sub>/nmol<br/>protein/s</b> | <b>SigmaPlot<br/>Equation</b>                | <b>Derived constants</b>                          |
| 0.005                                                                                                                                                 | 0.09                                                                  |                                              |                                                   |
| 0.01                                                                                                                                                  | 0.13                                                                  |                                              |                                                   |
| 0.02                                                                                                                                                  | 0.31                                                                  | $y=(1/4)*((a*x)*(1+z*b*x))/(1+b*x)$          |                                                   |
| 0.04                                                                                                                                                  | 0.54                                                                  | $y = \text{nmol NH}_3/\text{nmol protein/s}$ |                                                   |
| 0.06                                                                                                                                                  | 0.84                                                                  | $a = k_{re}$                                 | $k_{re} (\text{s}^{-1}\text{Atm}^{-1}) = 83(5)$   |
| 0.08                                                                                                                                                  | 1.00                                                                  | $b = K_a$                                    | $K_a = k_{re}/\bar{k} (\text{Atm}^{-1}) = 7.3(5)$ |
| 0.1                                                                                                                                                   | 1.27                                                                  | $z = k_{HP}/k_{ac}$                          |                                                   |
| 0.2                                                                                                                                                   | 1.77                                                                  | $x = \text{P}_{\text{N}_2}$                  |                                                   |
| 0.6                                                                                                                                                   | 2.33                                                                  |                                              |                                                   |
| 1                                                                                                                                                     | 2.42                                                                  |                                              |                                                   |
| <b>Fe-nitrogenase</b>                                                                                                                                 |                                                                       |                                              |                                                   |
| <b>P<sub>N<sub>2</sub></sub><br/>(atm)</b>                                                                                                            | <b>Specific Activity -<br/>nmol NH<sub>3</sub>/nmol<br/>protein/s</b> | <b>SigmaPlot<br/>Equation</b>                | <b>Derived constants</b>                          |
| 0.05                                                                                                                                                  | 0.08                                                                  |                                              |                                                   |
| 0.1                                                                                                                                                   | 0.19                                                                  | $y=(1/4)*((a*x)*(1+z*b*x))/(1+b*x)$          |                                                   |
| 0.2                                                                                                                                                   | 0.30                                                                  | $y = \text{nmol NH}_3/\text{nmol protein/s}$ |                                                   |
| 0.3                                                                                                                                                   | 0.40                                                                  | $a = k_{re}$                                 | $k_{re} (\text{s}^{-1}\text{Atm}^{-1}) = 8.5(5)$  |
| 0.4                                                                                                                                                   | 0.51                                                                  | $b = K_a$                                    | $K_a = k_{re}/\bar{k} (\text{Atm}^{-1}) = 1.8(2)$ |
| 0.6                                                                                                                                                   | 0.65                                                                  | $z = k_{HP}/k_{ac}$                          |                                                   |
| 0.8                                                                                                                                                   | 0.69                                                                  | $x = \text{P}_{\text{N}_2}$                  |                                                   |
| 1                                                                                                                                                     | 0.75                                                                  |                                              |                                                   |

**Table S2:** Values for ratio of H<sub>2</sub> produced to N<sub>2</sub> reduced per P<sub>N<sub>2</sub></sub>, equation used in SigmaPlot, and derived rate constants from **Figure 5**.

| <b>Mo-nitrogenase</b>                      |                                          |                                       |                                                                  |
|--------------------------------------------|------------------------------------------|---------------------------------------|------------------------------------------------------------------|
| <b>P<sub>N<sub>2</sub></sub><br/>(atm)</b> | <b>Ratio H<sub>2</sub>/N<sub>2</sub></b> | <b>SigmaPlot<br/>Equation</b>         | <b>Derived constants</b>                                         |
| 0.005                                      | 181.87                                   |                                       |                                                                  |
| 0.01                                       | 127.99                                   |                                       |                                                                  |
| 0.02                                       | 50.99                                    |                                       |                                                                  |
| 0.04                                       | 26.92                                    | $y=(1+(1/4)*(1+4*a)*b*x)/((1/4)*b*x)$ |                                                                  |
| 0.06                                       | 15.69                                    | $y = \text{ratio H}_2/\text{N}_2$     |                                                                  |
| 0.08                                       | 12.74                                    | $a = k_{\text{HP}}/k_{\text{ac}}$     | $\rho = k_{\text{re}}/k_{\text{HP}} (\text{Atm}^{-1}) = 5.1(1)$  |
| 0.1                                        | 8.96                                     | $b = \rho$                            |                                                                  |
| 0.2                                        | 4.92                                     | $x = \text{P}_{\text{N}_2}$           |                                                                  |
| 0.6                                        | 2.18                                     |                                       |                                                                  |
| 1                                          | 1.81                                     |                                       |                                                                  |
| <b>Fe-nitrogenase</b>                      |                                          |                                       |                                                                  |
| <b>P<sub>N<sub>2</sub></sub><br/>(atm)</b> | <b>Ratio H<sub>2</sub>/N<sub>2</sub></b> | <b>SigmaPlot<br/>Equation</b>         | <b>Derived constants</b>                                         |
| 0.05                                       | 101.65                                   |                                       |                                                                  |
| 0.1                                        | 43.64                                    |                                       |                                                                  |
| 0.2                                        | 25.39                                    | $y=(1+(1/4)*(1+4*a)*b*x)/((1/4)*b*x)$ |                                                                  |
| 0.3                                        | 17.75                                    | $y = \text{ratio H}_2/\text{N}_2$     |                                                                  |
| 0.4                                        | 12.30                                    | $a = k_{\text{HP}}/k_{\text{ac}}$     | $\rho = k_{\text{re}}/k_{\text{HP}} (\text{Atm}^{-1}) = 0.77(5)$ |
| 0.6                                        | 8.88                                     | $b = \rho$                            |                                                                  |
| 0.8                                        | 8.05                                     | $x = \text{P}_{\text{N}_2}$           |                                                                  |
| 1                                          | 6.62                                     |                                       |                                                                  |

**Table S3:** Values for ratio of H<sub>2</sub> produced to N<sub>2</sub> reduced per *M*Fe:Fe molar ratio, equation used in SigmaPlot, and derived values from **Figure 6**.

| <b>Mo-nitrogenase</b> |                                          |                                                                                                                                                                                                     |                      |
|-----------------------|------------------------------------------|-----------------------------------------------------------------------------------------------------------------------------------------------------------------------------------------------------|----------------------|
| <b>MoFe:Fe</b>        | <b>Ratio H<sub>2</sub>/N<sub>2</sub></b> | <b>SigmaPlot Equation</b>                                                                                                                                                                           | <b>Derived value</b> |
| 0.05                  | 1.81                                     | $y = \frac{1 + (1/4) * (1 + 4 * (a * x))^b * c}{(1/4) * b * c}$ y = ratio H <sub>2</sub> /N <sub>2</sub><br>a = scale factor<br>b = ρ<br>c = P <sub>N<sub>2</sub></sub><br>x = <i>M</i> Fe:Fe ratio | <i>a</i> = 0.22      |
| 0.5                   | 2.29                                     |                                                                                                                                                                                                     |                      |
| 1                     | 2.44                                     |                                                                                                                                                                                                     |                      |
| 2                     | 3.13                                     |                                                                                                                                                                                                     |                      |
| 4                     | 4.96                                     |                                                                                                                                                                                                     |                      |
| 8                     | 10.53                                    |                                                                                                                                                                                                     |                      |
| 16                    | 17.22                                    |                                                                                                                                                                                                     |                      |
| <b>Fe-nitrogenase</b> |                                          |                                                                                                                                                                                                     |                      |
| <b>FeFe:Fe</b>        | <b>Ratio H<sub>2</sub>/N<sub>2</sub></b> | <b>SigmaPlot Equation</b>                                                                                                                                                                           | <b>Derived value</b> |
| 0.0333                | 6.71                                     | $y = \frac{1 + (1/4) * (1 + 4 * (a * x))^b * c}{(1/4) * b * c}$ y = ratio H <sub>2</sub> /N <sub>2</sub><br>a = scale factor<br>b = ρ<br>c = P <sub>N<sub>2</sub></sub><br>x = <i>M</i> Fe:Fe ratio | <i>a</i> = 0.19      |
| 0.1                   | 6.80                                     |                                                                                                                                                                                                     |                      |
| 0.25                  | 7.27                                     |                                                                                                                                                                                                     |                      |
| 0.5                   | 7.31                                     |                                                                                                                                                                                                     |                      |
| 1                     | 8.07                                     |                                                                                                                                                                                                     |                      |
| 4                     | 13.19                                    |                                                                                                                                                                                                     |                      |

## References:

- (1) Lukoyanov, D., Khadka, N., Yang, Z.-Y., Dean, D. R., Seefeldt, L. C., and Hoffman, B. M. (2016) Reversible photoinduced reductive elimination of H<sub>2</sub> from the nitrogenase dihydride state, the E<sub>4</sub>(4H) Janus intermediate. *J. Am. Chem. Soc.* *138*, 1320–1327.
- (2) Lukoyanov, D., Khadka, N., Yang, Z.-Y., Dean, D. R., Seefeldt, L. C., and Hoffman, B. M. (2016) Reductive elimination of H<sub>2</sub> activates nitrogenase to reduce the N≡N triple bond: characterization of the E<sub>4</sub>(4H) Janus intermediate in wild-type enzyme. *J. Am. Chem. Soc.* *138*, 10674–10683.
- (3) Lukoyanov, D., Yang, Z.-Y., Khadka, N., Dean, D. R., Seefeldt, L. C., and Hoffman, B. M. (2015) Identification of a key catalytic intermediate demonstrates that nitrogenase is activated by the reversible exchange of N<sub>2</sub> for H<sub>2</sub>. *J. Am. Chem. Soc.* *137*, 3610–3615.
- (4) Hoffman, B. M., Lukoyanov, D., Yang, Z.-Y., Dean, D. R., and Seefeldt, L. C. (2014) Mechanism of nitrogen fixation by nitrogenase: The next stage. *Chem. Rev.* *114*, 4041–4062.
- (5) Yang, Z.-Y., Khadka, N., Lukoyanov, D., Hoffman, B. M., Dean, D. R., and Seefeldt, L. C. (2013) On reversible H<sub>2</sub> loss upon N<sub>2</sub> binding to FeMo-cofactor of nitrogenase. *Proc. Natl. Acad. Sci. U. S. A.* *110*, 16327–16332.
- (6) Lukoyanov, D., Yang, Z.-Y., Barney, B. M., Dean, D. R., Seefeldt, L. C., and Hoffman, B. M. (2012) Unification of reaction pathway and kinetic scheme for N<sub>2</sub> reduction catalyzed by nitrogenase. *Proc. Natl. Acad. Sci. U.S.A.* *109*, 5583–5587.
